# Supplementary material
Source: MDPI journal article supplement (https://www.mdpi.com/2073-4395/10/6/852)
Supplement: s1 [file s1]

**Supplemental Table 1.** Average monthly air temperature (°C) at Jackson and Grand Junction during the growing season of 2012 and 2013.

| Month     | Jackson |      | Grand Junction |      |
|-----------|---------|------|----------------|------|
|           | 2012    | 2013 | 2012           | 2013 |
| January   | 6.5     | 5.3  | 7.2            | 4.7  |
| February  | 7.3     | 5.7  | 7.8            | 3.9  |
| March     | 16.7    | 6.8  | 16.9           | 7.2  |
| April     | 16.8    | 14.7 | 16.9           | 14.7 |
| May       | 22.8    | 19.6 | 21.9           | 19.4 |
| June      | 24.3    | 24.8 | 24.2           | 25.0 |
| July      | 28.2    | 24.8 | 27.8           | 25.0 |
| August    | 26.2    | 24.9 | 26.1           | 25.6 |
| September | 22.3    | 22.6 | 21.7           | 23.6 |
| October   | 14.8    | 15.9 | 14.2           | 16.7 |
| November  | 8.5     | 7.8  | 8.9            | 8.6  |
| December  | 8.4     | 4.7  | 8.9            | 5.3  |
